# Supplementary material for: New particle formation and its effect on CCN abundance in the summer Arctic: a case study during PS106 cruise
Source: Copernicus journal article supplement (doi:10.5194/acp-2019-600), 2019-08-01
Supplement: Supplementary file 1 [file acp-2019-600-supplement.pdf]

# Supplementary material

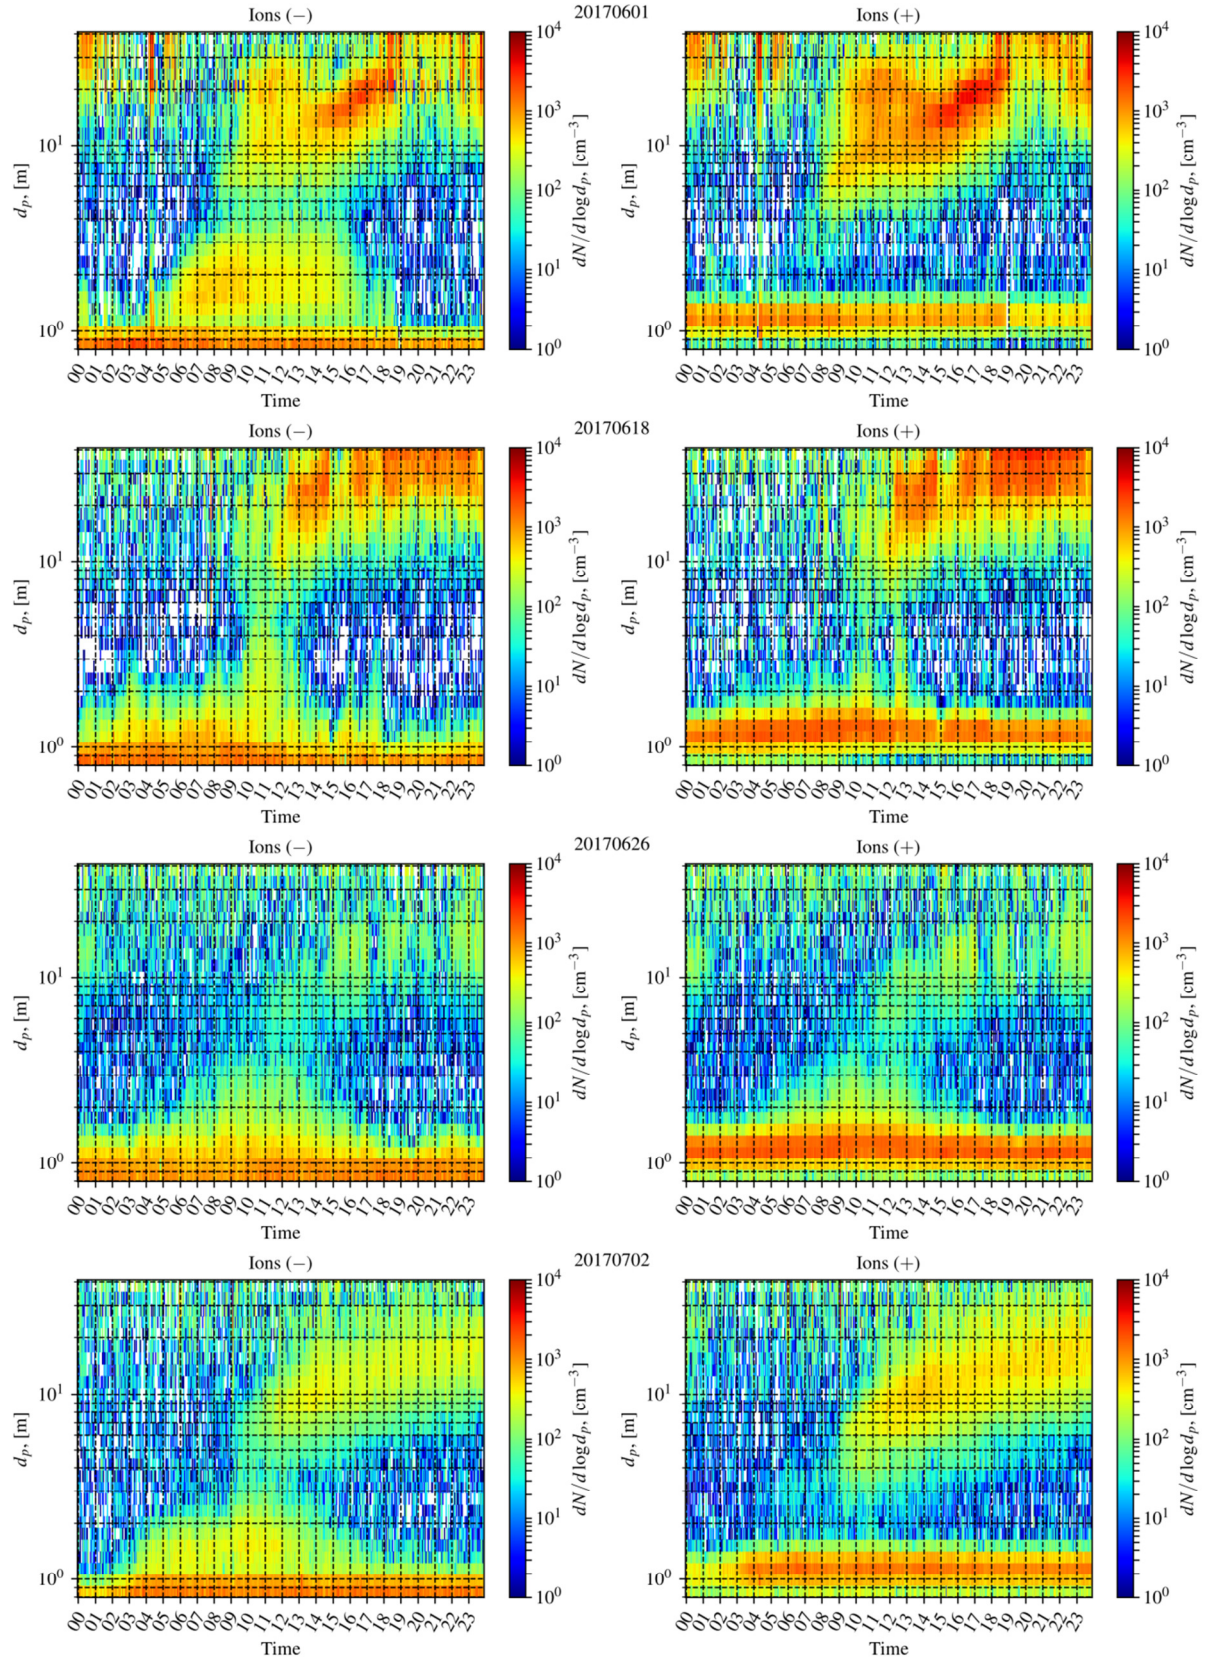

**SP-1. Negative and positive ions during new particle formation events observed during RV Polarstern cruise PS106.** Ion number size distributions were measured using Neutral cluster and Air Ion Spectrometer (NAIS). The color scale represents ion number concentration as  $dN/d \log d_p$ . The presence of corona charger ions (<2 nm) can also be seen in NAIS data. This artefact was excluded from data analysis.
